# Supplementary material for: Recent developments in the synthetic chemistry of technetium disulfide
Source: Royal Society of Chemistry journal article supplement (doi:10.1039/c3dt52079j), 2013-01-01
Supplement: c3dt52079j.pdf [file c3dt52079j.pdf]

## Supporting Information

### **Recent Developments in the Synthetic Chemistry of Technetium Disulfide**

*Maryline Ferrier\**, *William M. Kerlin*, *Frederic Poineau*, *Alfred P. Sattelberger* and *Kenneth R. Czerwinski*

#### 1. Preparation of precursors

Caution. Technetium-99 is a weak beta emitter ( $E_{\max} = 292$  keV). All manipulations were performed in a radiochemistry laboratory at UNLV designed for chemical synthesis with radionuclides using efficient HEPA-filtered fume hoods and following locally approved radioisotope handling and monitoring procedures. The starting compound  $\text{NH}_4\text{TcO}_4$  was purchased from Oak Ridge National Laboratory.

Starting compounds were prepared according to literature:  $\text{Tc}_2\text{S}_7$ <sup>1</sup>, Tc metal<sup>2</sup>,  $\text{KTcO}_4$ <sup>3</sup>,  $\text{Tc}_2(\text{O}_2\text{CCH}_3)_5$ <sup>4</sup> and  $\text{K}_2\text{TcCl}_6$ <sup>5</sup>. A lecture bottle of  $\text{H}_2\text{S}$  gas was obtained from Sigma-Aldrich all the other chemicals were used as received.

As the synthesis of ditechneium penta-acetate has not been published yet, a brief description of the experimental is given:

In a glass vial was added  $\text{KTcO}_4$  (50 mg, 0.25 mmol) and 7 mL of acetic acid, which was placed inside a 23 mL Teflon Parr Instruments 4749 autoclave. Sodium borohydride (250 mg, 6.6 mmol) was added external to the small glass vial with 200  $\mu\text{L}$  of deionized water. The autoclave was sealed and heated in an oven at 210 °C for 72 hrs.  $\text{H}_{2(\text{g})}$  was produced in the reaction resulting in approximately 60 atm pressure in the autoclave. The reaction vessel was cooled to room temperature and opened revealing large purple crystals of  $\text{Tc}_2(\mu\text{-O}_2\text{CCH}_3)_4(\eta\text{-O}_2\text{CCH}_3)$ . The air stable product was rinsed 2 times with each of the following solvents: acetic acid, isopropanol and diethyl ether. The solid was dried in air and weighed (43.9 mg, yield = 72%).

#### 2. EXAFS Spectroscopy

Measurements were performed at the Argonne National Laboratory Advanced Photon Source at the BESSRC-CAT 12 BM-B station. The solids were diluted (2 %) in mass in boron nitride (BN). The samples were placed in an aluminum sample holder equipped with Kapton windows. For the sample C the EXAFS spectra were recorded at the Tc-K edge (21, 044 eV) in fluorescence mode at room temperature using a 13-element germanium detector. For  $\text{TcS}_2$ , sample A and B, the EXAFS spectra were recorded in transmission mode. A double crystal of Si [1 1 1] was used as a monochromator. Rejections of harmonics were performed using rhodium mirrors. The energy was calibrated using a molybdenum foil. Fifteen scans were recorded in the  $k$  range [0 - 15]  $\text{\AA}^{-1}$  and averaged. The EXAFS spectra were extracted using the Athena software<sup>6</sup> and data analysis was performed using Winxas.<sup>7</sup> For the fitting procedure, amplitude and phase shift functions were calculated by FEFF 8.2.<sup>8</sup> Input files were generated by Atoms.<sup>9</sup> The adjustments of the  $k^3$ -weighted EXAFS spectra were under the constraints  $S_0^2 = 0.9$ .

### 3. Other techniques

Energy Dispersive X-ray (EDX) spectroscopy measurements were performed on a TECNAI-G2-F30 Supertwin transmission electron microscope with a 300 keV field emission gun; the samples were prepared by grinding the compound with hexane in an agate mortar, taking one drop of the solution and placing it onto a 3 mm diameter carbon film supported on a copper grid.

For  $^{99}\text{Tc}$  elemental analyses, weighed amounts of the compounds (ca. 5 mg) were suspended in concentrated  $\text{HClO}_4$  (5 mL) for several days. After complete dissolution, the solutions were diluted by 1000 with DI  $\text{H}_2\text{O}$ .  $^{99}\text{Tc}$  concentrations were determined by liquid scintillation counting using a Packard 2500 scintillation analyzer. The scintillation cocktail was ULTIMA GOLD ABTM (Packard). The concentration of the solutions was determined using a calibration curve performed in solution with composition similar to the experimental parameters.

The powder X-ray Diffraction patterns were obtained using a Bruker D8 Advance diffractometer employing  $\text{Cu K}\alpha_1$  X-rays from 10 to  $120^\circ$  ( $2\theta$ ) with a step size of  $0.008^\circ$  ( $2\theta$ ) and 0.65 s/step. The samples (ca. 10-20 mg) were ground in an agate mortar, dispersed on a low-background silicon disk sample holder, covered with a radiological containment dome, and placed in the instrument for measurement.

### 4. Decomposition of $\text{Tc}_2\text{S}_7$ under flowing argon

An initial attempt to prepare  $\text{TcS}_2$  from the thermal decomposition of  $\text{Tc}_2\text{S}_7$  was performed in a flowing gas system under argon. A quartz boat containing  $\text{Tc}_2\text{S}_7$  (105 mg) was placed in a 50 cm quartz tube and heated at  $1000^\circ\text{C}$  for an hour in a clamshell furnace. During the reaction, a yellow powder (sulfur) sublimed to the cold end of the tube. The black powder was weighed (53 mg) and analyzed by EXAFS spectroscopy. The spectrum was fitted using Tc-S and Tc-Tc scattering calculated in  $\text{TcS}_2$  and Tc metal.

The XAFS analysis was compared to other solids:  $\text{TcS}_2$  the reference compound used in the paper (thermal decomposition of  $\text{Tc}_2\text{S}_7$  in a sealed tube with excess sulfur) and  $\text{Tc}_2\text{S}_7$  (starting compound).

Results (Fig. S1) showed the solid to be a mixture of Tc metal and  $\text{TcS}_2$  and different from the starting compound.

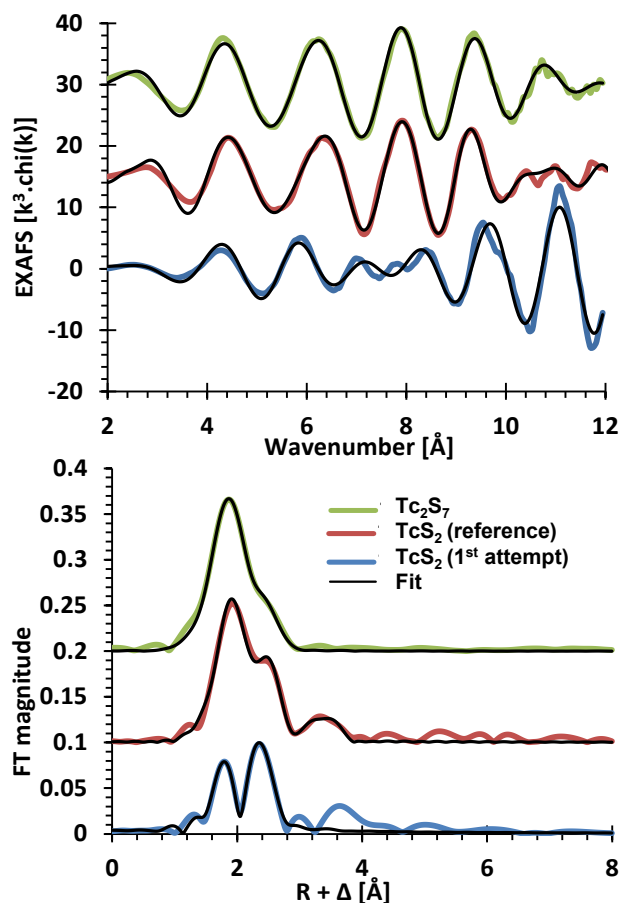

Fig. S1 Fitted  $k^3$ -EXAFS spectra (top) and Fourier Transform of  $k^3$ -EXAFS spectra (bottom) for the solids:  $\text{TcS}_2$  1<sup>st</sup> attempt (blue) compared to  $\text{TcS}_2$  (red) and  $\text{Tc}_2\text{S}_7$  (green). Fits are in black. Adjustment performed in the  $k$ -range [2; 12]  $\text{\AA}^{-1}$ .

## 5. LSC

Table S1 LSC result and analysis

|                                                        | $\text{TcS}_2$ | Sample A | Sample B | Sample C |
|--------------------------------------------------------|----------------|----------|----------|----------|
| Mass compound analyzed [g]                             | 0.0045         | 0.0042   | 0.0051   | 0.0044   |
| Counts [CPM]                                           | 2055           | 1955     | 2308     | 1986     |
| Concentration $^{99}\text{Tc}$ before dilution [mol/L] | 0.0054         | 0.0051   | 0.0061   | 0.0052   |
| Mass Tc deducted [g]                                   | 0.0027         | 0.0025   | 0.0030   | 0.0026   |
| % Tc in sample                                         | 0.5958         | 0.6066   | 0.5920   | 0.5885   |
| Stoichiometry $\text{TcS}_x$ , $x =$                   | 2.09(6)        | 2.01(6)  | 2.13(6)  | 2.16(6)  |

## 6. EDX

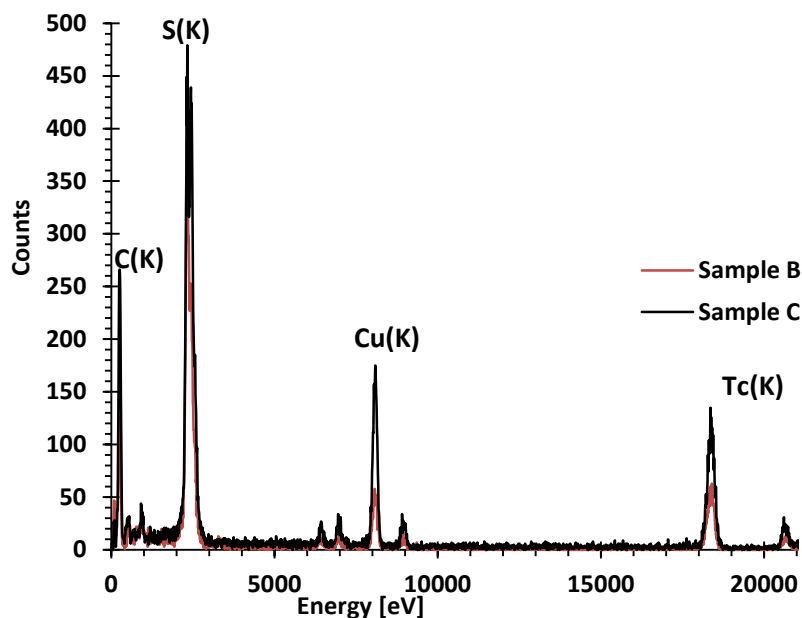

Fig. S2 EDX spectra for Sample B (red) and Sample C (black). C and Cu peaks from the sample holder.

Table S2 Values of the EDX analyses of Sample B and Sample C shown in Fig. S2.

|          | Elements | Weight% | Atomic% | Stoichiometry       |
|----------|----------|---------|---------|---------------------|
| Sample B | S (K)    | 40.864  | 67.869  | TcS <sub>2.11</sub> |
|          | Tc (K)   | 59.136  | 32.130  |                     |
| Sample C | S (K)    | 43.425  | 70.116  | TcS <sub>2.34</sub> |
|          | Tc (K)   | 56.574  | 29.883  |                     |

## 7. EXAFS adjustments

Table S3 Results for the adjustments for the scattering path Tc-Tc for samples B and C at fixed Tc-S scattering C.N. = 6 and  $S_0^2 = 0.9$ .

|          | Scattering path | C.N. | R [Å] | $\sigma^2$ [Å <sup>2</sup> ] | $\Delta E_0$ [eV] | Reduced $\chi^2$ |
|----------|-----------------|------|-------|------------------------------|-------------------|------------------|
| Sample B | Tc-Tc           | 3    | 2.79  | 0.0086                       | 0.96              | 72.05            |
|          |                 | 2    | 2.79  | 0.0059                       | 0.79              | 63.24            |
| Sample C | Tc-Tc           | 3    | 2.75  | 0.0087                       | 5.56              | 118.97           |
|          |                 | 2    | 2.75  | 0.0065                       | 5.28              | 76.21            |

## 8. XRD structure of TcS<sub>2</sub>

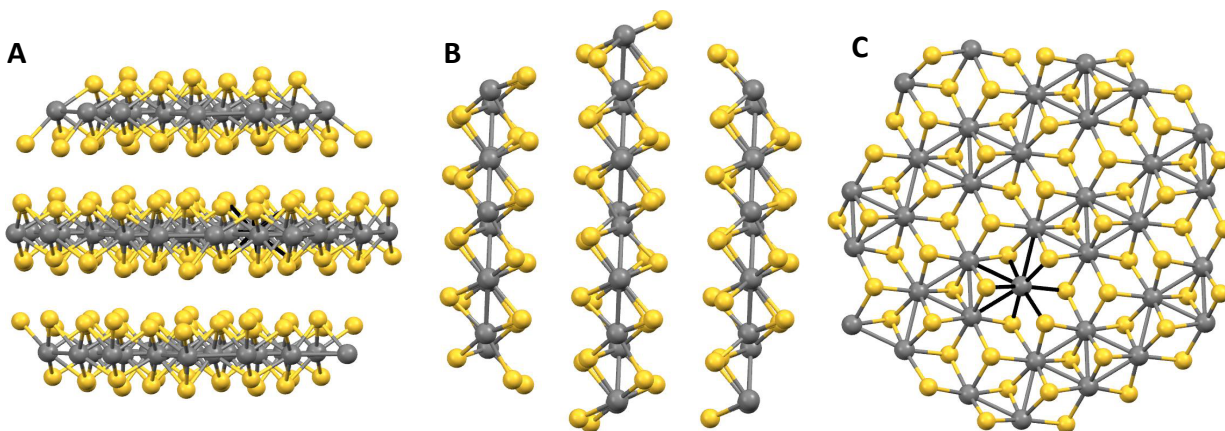

Fig. S3 Ball and stick representation of TcS<sub>2</sub>: view along a-axis (A), along the b-axis (B), along the c-axis (C).

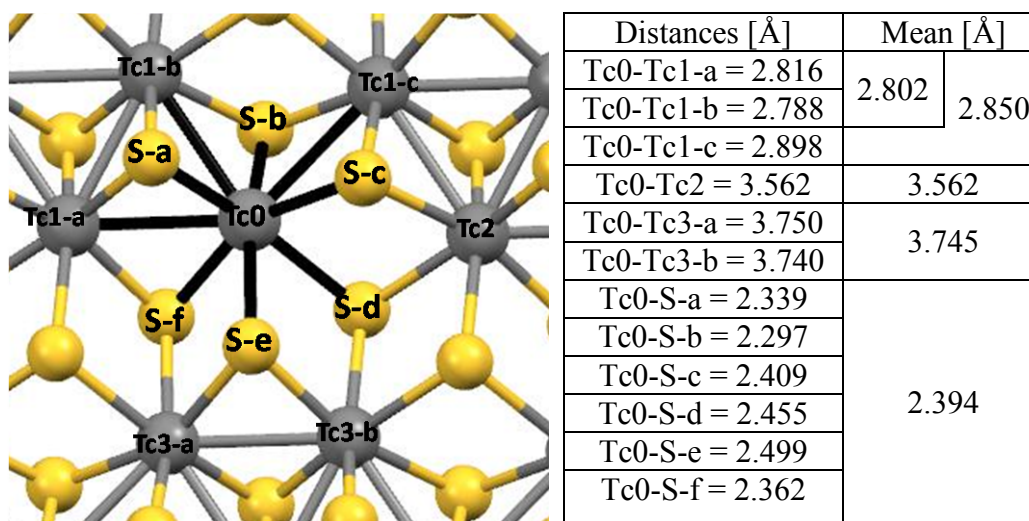

Fig. S4 Interatomic distances [Å] in TcS<sub>2</sub> determined by XRD. Tc0 represents the absorbing atom.

<sup>1</sup> E. E. Motta, G. E. Boyd and Q. V. Larson, *Phys. Rev.*, 1947, **72**, 1270.

<sup>2</sup> F. Poineau, E. E. Rodriguez, P. M. Foster, A. P. Sattelberger, A. K. Cheetham and K. R. Czerwinski, *J. Am. Chem. Soc.*, 2009, **131**, 910-911.

<sup>3</sup> R. Busey, R. Bevan and R. Gilbert, *J. Chem. Thermodynamics*, 1972, **4**(1), 77-84.

<sup>4</sup> W. M. Kerlin et al., in progress.

<sup>5</sup> J. Dalziel, N. S. Gill, R. S. Nyholm and R. D. Peacock, *J. Chem. Soc.*, 1958, 4012-4016.

<sup>6</sup> M. Newville, P. Livins, Y. Yacoby, E. A. Stern and J. J. Rehr, *Phys. Rev. B*, 1993, **47**(21), 14126.

<sup>7</sup> T. Ressler, *J. Synchrotron Radiat.*, 1998, **5**(2), 118.

<sup>8</sup> J. J. Rehr and R. C. Albers, *Rev. Mod. Phys.*, 2000, **72**, 621.

<sup>9</sup> B. Ravel, *J. Synchrotron Radiat.*, 2001, **8**, 314.
